# Supplementary material for: 1H NMR-based metabonomic analysis of serum and urine in a nonhuman primate model of diabetic nephropathy
Source: Royal Society of Chemistry journal article supplement (doi:10.1039/c3mb70212j), 2013-07-22
Supplement: c3mb70212j.pdf [file c3mb70212j.pdf]

## Supplementary Figures

### Figure S1

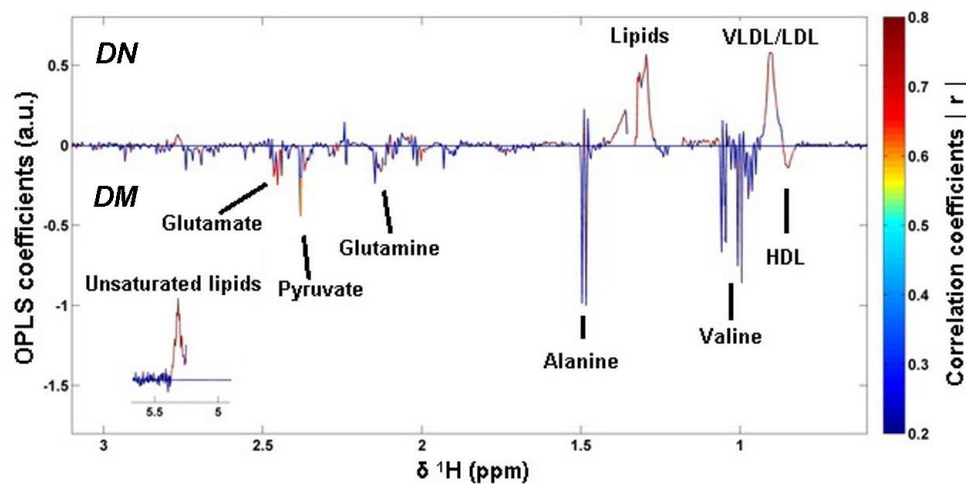

**Fig. S1** OPLS-DA loading plots derived from serum <sup>1</sup>H NMR spectra in DN related to DM group. The colored correlation coefficients indicated significant changed metabolites which contributed to the group differentiation.

### Figure S2

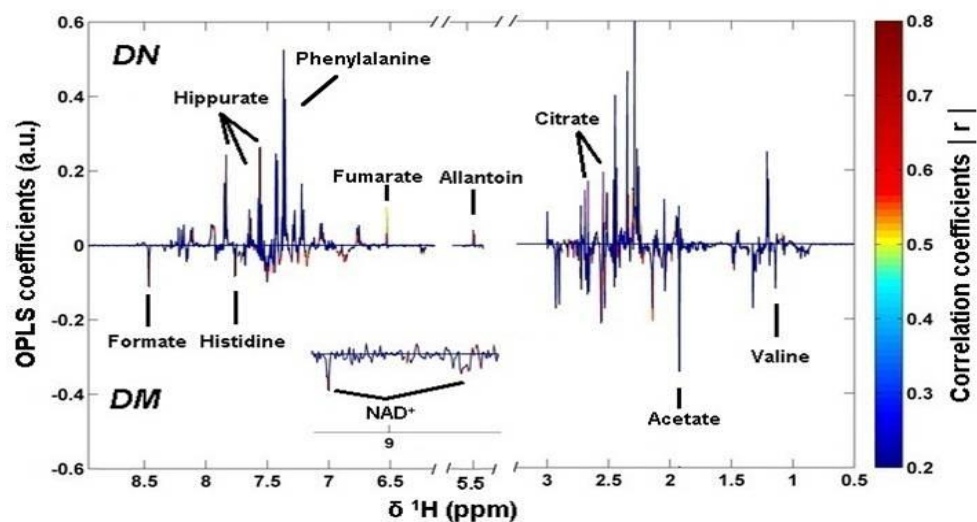

**Fig. S2** OPLS-DA loading plots derived from urine <sup>1</sup>H NMR spectra in DN related to DM group. The colored correlation coefficients indicated significant changed metabolites which contributed to the group differentiation.
